# Supplementary material
Source: PubMed Central journal article supplement (PMC7173821)
Supplement: mmc1.pdf [file mmc1.pdf]

# THE LANCET Psychiatry

## Supplementary appendix

This appendix formed part of the original submission and has been peer reviewed.  
We post it as supplied by the authors.

Supplement to: Gunnell D, Appleby L, Arensman E, et al. Suicide risk and prevention during the COVID-19 pandemic. *Lancet Psychiatry* 2020; published online April 21.  
[https://doi.org/10.1016/S2215-0366\(20\)30171-1](https://doi.org/10.1016/S2215-0366(20)30171-1).

## The International COVID-19 Suicide Prevention Research Collaboration

|                                |                                                                                                                                                                      |
|--------------------------------|----------------------------------------------------------------------------------------------------------------------------------------------------------------------|
| Prof Eric Caine (MD)           | Department of Psychiatry, University of Rochester, Rochester, New York, USA                                                                                          |
| Dr Lai Fong Chan (MMedPsych)   | Department of Psychiatry, National University of Malaysia, Kuala Lumpur, Malaysia                                                                                    |
| Dr Shu-Sen Chang (PhD)         | Institute of Health Behaviors and Community Sciences and Department of Public Health, National Taiwan University, Taipei, Taiwan                                     |
| Prof Ying-Yeh Chen (ScD)       | Taipei City Psychiatric Centre, Taipei City Hospital, Taipei, Taiwan                                                                                                 |
|                                | Institute of Public Health and Department of Public Health, National Yang-Ming University, Taipei, Taiwan                                                            |
| Prof Helen Christensen (PhD)   | Black Dog Institute, University of New South Wales, Sydney, New South Wales, Australia                                                                               |
| Prof Rakhi Dandona (PhD)       | Public Health Foundation of India, Gurugram, National Capital Region, India                                                                                          |
|                                | Institute for Health Metrics and Evaluation, University of Washington, Seattle, Washington, USA                                                                      |
| Prof Michael Eddleston (ScD)   | Centre for Pesticide Suicide Prevention, University of Edinburgh, Edinburgh, UK                                                                                      |
| Dr Annette Erlangsen (PhD)     | Danish Research Institute for Suicide Prevention, Mental Health Centre Copenhagen, Copenhagen, Denmark                                                               |
|                                | Department of Mental Health, Johns Hopkins University Bloomberg School of Public Health, Baltimore, Maryland, USA                                                    |
| Dr Jill Harkavy-Friedman (PhD) | American Foundation for Suicide Prevention, New York, USA                                                                                                            |
| Dr Olivia J Kirtley (PhD)      | Center for Contextual Psychiatry, KU Leuven, Leuven, Belgium                                                                                                         |
| Dr Duleeka Knipe (PhD)         | Population Health Sciences, University of Bristol, Bristol, UK                                                                                                       |
| Prof Flemming Konradsen (PhD)  | Department of Public Health, University of Copenhagen, Copenhagen, Denmark                                                                                           |
| Prof Shiwei Liu (PhD)          | Chinese Center for Disease Control and Prevention, Beijing, China                                                                                                    |
| Sally McManus (MSc)            | National Centre for Social Research, London, UK                                                                                                                      |
|                                | Violence and Society Centre, City University of London, London, UK                                                                                                   |
| Prof Lars Mehlum (MD, PhD)     | National Centre for Suicide Research and Prevention, Institute of Clinical Medicine, University of Oslo, Oslo, Norway                                                |
| Prof Matthew Miller (MD, ScD)  | Bouvé College of Health Sciences, Northeastern University, Boston, Massachusetts, USA                                                                                |
|                                | Harvard Injury Control Research Center, Harvard TH Chan School of Public Health, Boston, Massachusetts, USA                                                          |
| Prof Paul Moran (MD)           | Population Health Sciences, University of Bristol, Bristol, UK                                                                                                       |
|                                | National Institute of Health Research Biomedical Research Centre at the University Hospitals Bristol NHS Foundation Trust and the University of Bristol, Bristol, UK |
| Jacqui Morrissey (MSc)         | Samaritans, Ewell, Surrey, UK                                                                                                                                        |

|                                         |                                                                                                                                                                             |
|-----------------------------------------|-----------------------------------------------------------------------------------------------------------------------------------------------------------------------------|
| Dr Christine Moutier (MD)               | American Foundation for Suicide Prevention, New York, USA                                                                                                                   |
| Prof Thomas Niederkrotenthaler (MD PhD) | Unit Suicide Research & Mental Health Promotion, Department of Social and Preventive Medicine, Center for Public Health, Medical University of Vienna                       |
| Prof Merete Nordentoft (PhD)            | Danish Research Institute for Suicide Prevention, Mental Health Centre Copenhagen, Copenhagen, Denmark.                                                                     |
|                                         | Institute of Clinical Medicine, University of Copenhagen, Copenhagen, Denmark                                                                                               |
| Prof Siobhan O'Neill (PhD)              | School of Psychology, Ulster University, Coleraine, Co. Londonderry, Northern Ireland                                                                                       |
| Prof Andrew Page (PhD)                  | Translational Health Research Institute, Western Sydney University, Penrith, New South Wales, Australia                                                                     |
| Prof Michael Phillips (PhD)             | Suicide Research and Prevention Center, Shanghai Jiao Tong University School Medicine, Shanghai, China                                                                      |
| Prof Steve Platt (FACSS)                | Usher Institute, University of Edinburgh, Edinburgh, UK                                                                                                                     |
| Prof Maurizio Pompili (MD, PhD)         | Department of Neurosciences, Mental Health and Sensory Organs, Suicide Prevention Center, Sant'Andrea Hospital, Sapienza University of Rome, Rome, Italy                    |
| Prof Ping Qin (PhD)                     | National Centre for Suicide Research and Prevention, University of Oslo, Oslo, Norway                                                                                       |
| Prof Mohsen Rezaeian (PhD)              | Epidemiology and Biostatistics Department, Occupational Environmental Research Center, Rafsanjan Medical School, Rafsanjan University of Medical Sciences, Rafsanjan, Iran. |
| Dr Morton M Silverman (MD)              | The Medical College of Wisconsin, in Milwaukee, Wisconsin, USA                                                                                                              |
| Dr Mark Sinyor (MD)                     | Department of Psychiatry, University of Toronto, Toronto, Canada                                                                                                            |
| Prof Steven Stack (PhD)                 | Department of Criminal Justice, Wayne State University, Detroit, Michigan, USA                                                                                              |
|                                         | Department of Psychiatry and Behavioral Neuroscience, Wayne State University, Detroit, Michigan, USA                                                                        |
| Prof Ellen Townsend (PhD)               | Self-Harm Research Group, School of Psychology, University of Nottingham, Nottingham, UK                                                                                    |
| Dr Gustavo Turecki (MD, PhD)            | Department of Psychiatry, McGill University, Montreal, Quebec, Canada.                                                                                                      |
| Dr Lakshmi Vijayakumar (PhD)            | Department of Psychiatry & Voluntary Health Services, SNEHA, Tamil Nadu, India                                                                                              |
| Prof Paul Yip (PhD)                     | HKJC Centre for Suicide Research and Prevention, The University of Hong Kong, Hong Kong SAR, China                                                                          |
